# Supplementary material
Source: MDPI journal article supplement (https://www.mdpi.com/2071-1050/16/1/425)
Supplement: s1 [file s1]

## **Supplementary Materials**

**Table S1.** Composition of the precipitates obtained at pH 10.5 from acidic wastewater obtained after sequential acid leaching tests of GRPW at 90 °C for 2 hours using a 3 wt% H<sub>2</sub>SO<sub>4</sub> solution and stirring rate of 50 rpm.

[illegible]

**Table S2.** LCA normalization analysis for the three approaches evaluated in this work.

| <b>Impact category</b>                  | <b>Approach 1</b> | <b>Approach 2</b> | <b>Approach 3</b> |
|-----------------------------------------|-------------------|-------------------|-------------------|
| Global warming                          | 0.193868259       | 0.220244065       | 0.193106091       |
| Stratospheric ozone depletion           | 0.009937175       | 0.011621974       | 0.00942081        |
| Ionizing radiation                      | 0.824928517       | 1.132593019       | 0.853643466       |
| Ozone formation, Human health           | 0.143977104       | 0.160847943       | 0.13550603        |
| Fine particulate matter formation       | 0.145629073       | 0.150556772       | 0.137407625       |
| Ozone formation, Terrestrial ecosystems | 0.1700956         | 0.189846903       | 0.160084716       |
| Terrestrial acidification               | 0.291181492       | 0.300345837       | 0.287489258       |
| Freshwater eutrophication               | 1.061056054       | 1.053439006       | 0.993245642       |
| Marine eutrophication                   | 0.313924883       | 0.292823845       | 0.28919638        |
| Terrestrial ecotoxicity                 | 1.268267671       | 1.283963716       | 1.253082362       |
| Freshwater ecotoxicity                  | 7.399062304       | 7.595000845       | 7.359375197       |
| Marine ecotoxicity                      | 5.629337486       | 5.785071772       | 5.596770488       |
| Human carcinogenic toxicity             | 9.878508968       | 9.854297486       | 9.119677506       |
| Human non-carcinogenic toxicity         | 0.116851289       | 0.11882389        | 0.114770277       |
| Land use                                | 0.013542634       | 0.01683086        | 0.013943576       |
| Mineral resource scarcity               | -5.05522E-06      | -3.88073E-06      | -5.18982E-05      |
| Fossil resource scarcity                | 0.470909642       | 0.549992577       | 0.470996776       |
| Water consumption                       | 0.144898742       | 0.152367648       | 0.156087088       |

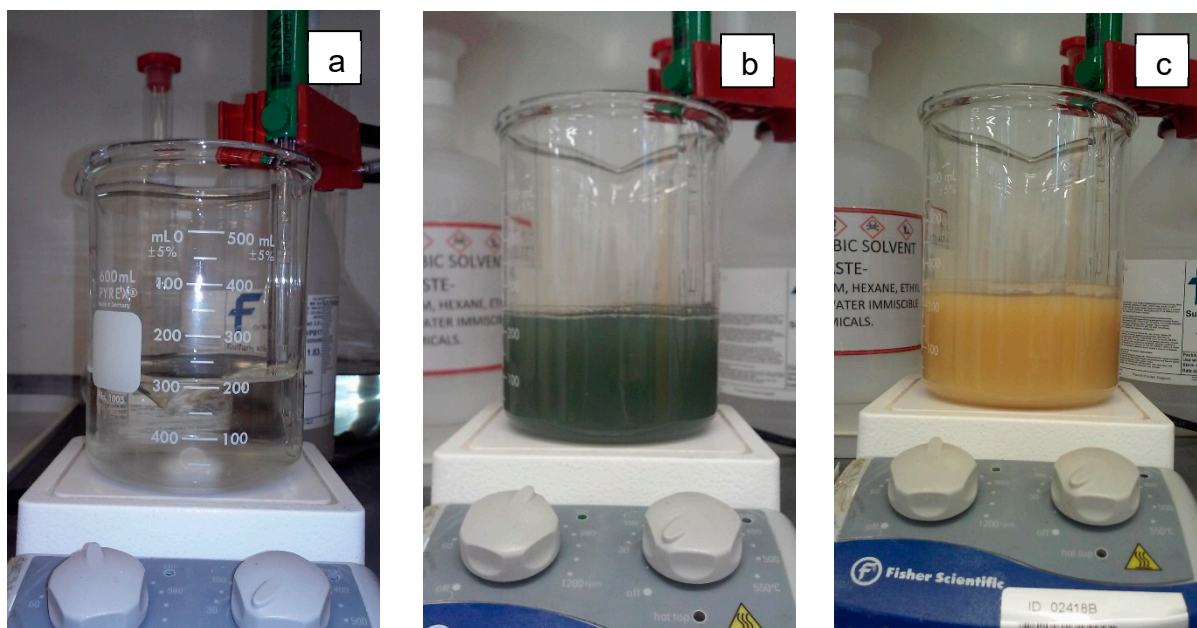

**Figure S1.** Beaker with wastewater at pH 5.5 (a), pH 8.0 (b) and pH 10.5 (c).

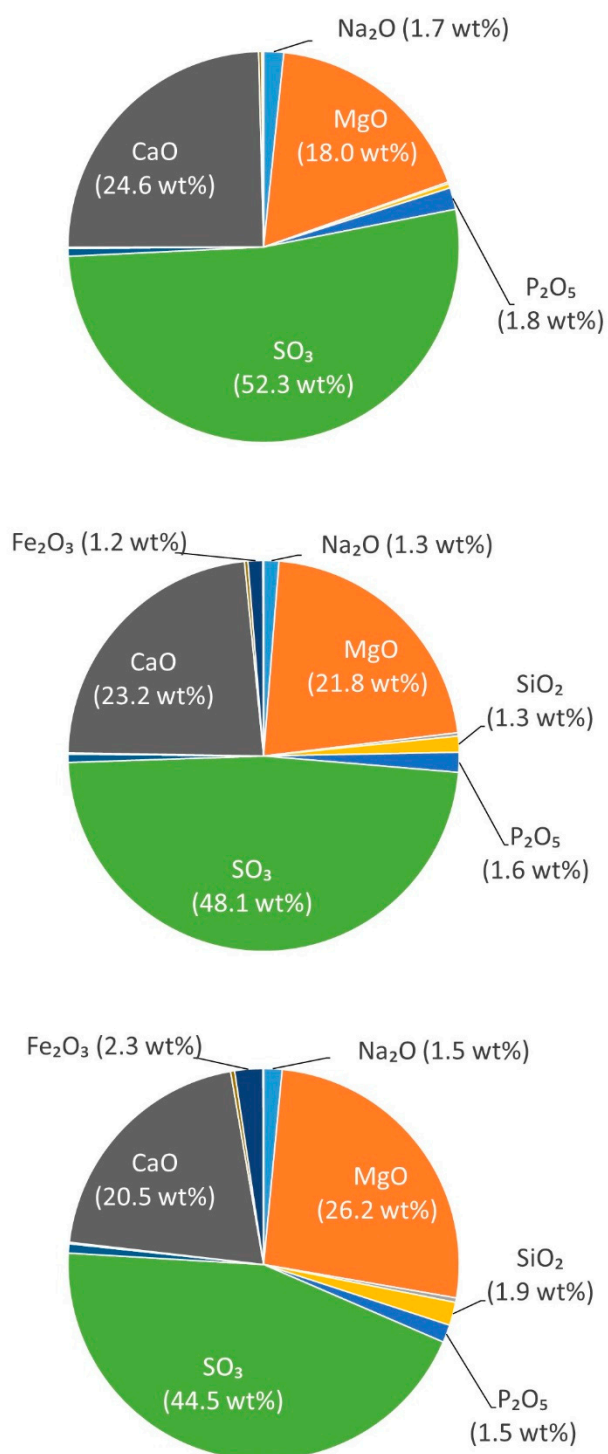

**Figure S2.** Chemical composition of precipitates produced at pH 10.5 from acidic wastewater obtained after acid leaching of GDPW at 90 °C for 2 hours using 3 wt% H<sub>2</sub>SO<sub>4</sub> solutions prepared with purified water (top), treated water 1 (middle) and treated water 2 (bottom) and stirring rate of 50 rpm.
